# Supplementary material for: Effect of the Composition of Lanthanide Complexes on Their Luminescence Enhancement by Ag@SiO2 Core-Shell Nanoparticles
Source: MDPI journal article supplement (doi:10.3390/nano8020098), 2018-02-09
Supplement: s1 [file s1]

# Effect of the Composition of Lanthanide Complexes on Their Luminescence Enhancement by Ag@SiO<sub>2</sub> Core-Shell Nanoparticles

Xiao-Jing Wang, Yan-Rong Qu, Yong-Liang Zhao and Hai-Bin Chu \*

College of Chemistry and Chemical Engineering, Inner Mongolia University, Huhhot 010021, China; 15248077022@163.com (X.-J.W.); quyanrong@126.com (Y.-R.Q.); hxzhaoyl@163.com (Y.-L.Z.)

\* Correspondence: chuhb@imu.edu.cn; Tel.: +86-471-499-2692

## 1. UV-vis absorption data of ligands and complexes

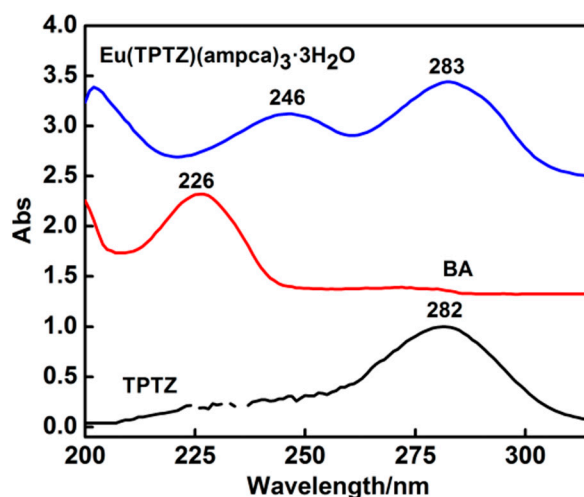

Fig S1. UV-vis absorption spectra of Eu(TPTZ)(BA)<sub>3</sub>·3H<sub>2</sub>O and ligands.

Table S1. UV-vis absorption peak positions of complexes and ligands.

| Ligands and complexes                           | Peak position (nm) |
|-------------------------------------------------|--------------------|
| TPTZ                                            | 282                |
| BA                                              | 226                |
| phen                                            | 263                |
| PTA                                             | 239                |
| ampca                                           | 350                |
| Eu(phen)(ampca) <sub>3</sub> ·3H <sub>2</sub> O | 356                |
| Eu(TPTZ)(BA) <sub>3</sub> ·3H <sub>2</sub> O    | 283                |
| Eu(TPTZ)(ampca) <sub>3</sub> ·3H <sub>2</sub> O | 364                |
| Eu(phen)(BA) <sub>3</sub> ·3H <sub>2</sub> O    | 289                |
| Eu(phen)(PTA) <sub>1.5</sub> ·3H <sub>2</sub> O | 264                |

## 2. Luminescence emission spectra of the complexes

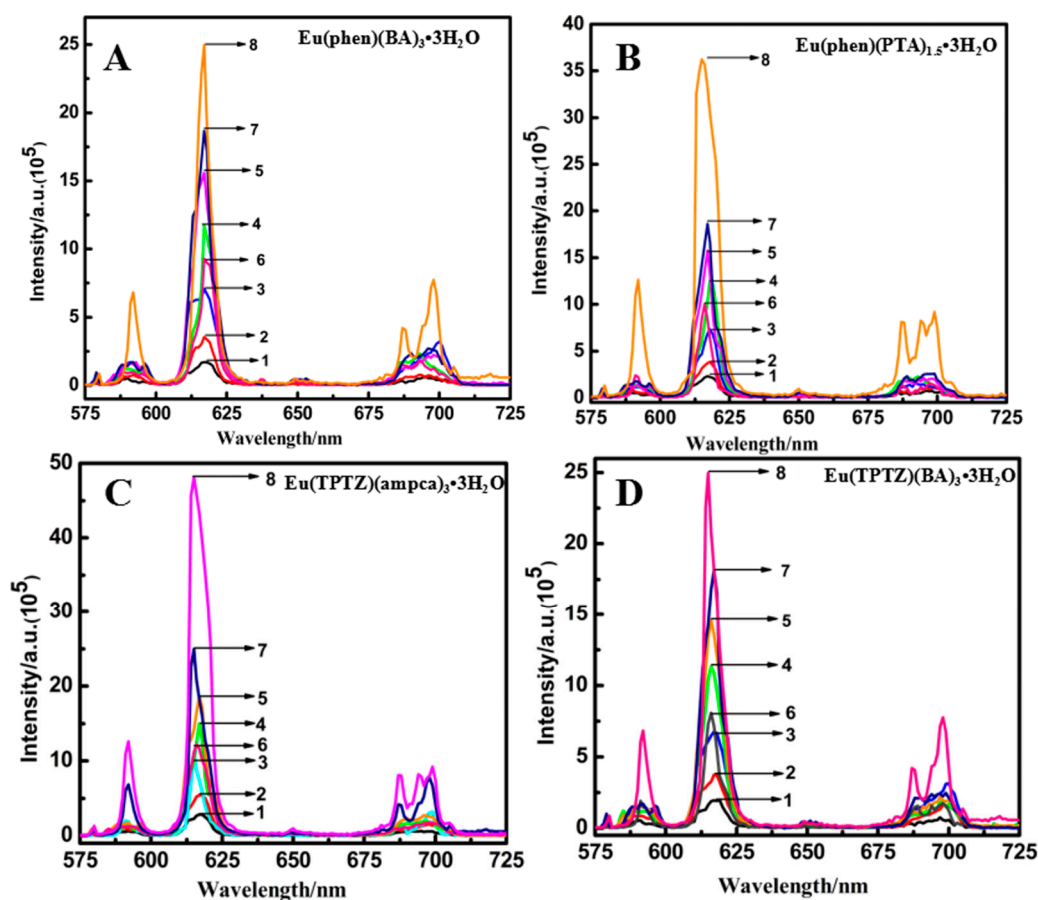

**Fig S2.** Luminescence emission spectra of Eu complexes with Ag@SiO<sub>2</sub> nanoparticles. (A) Eu(phen)(BA)<sub>3</sub>·3H<sub>2</sub>O; (B) Eu(phen)(PTA)<sub>1.5</sub>·3H<sub>2</sub>O; (C) Eu(TPTZ)(ampca)<sub>3</sub>·3H<sub>2</sub>O; (D) Eu(TPTZ)(BA)<sub>3</sub>·3H<sub>2</sub>O. Sample 1 is the pure complex. 2~5 represent the complex added with the Ag@SiO<sub>2</sub> nanoparticles with core size of 80–100 nm and shell thickness of 5, 12, 20, 30 nm. 6~8 represent the complex added with the Ag@SiO<sub>2</sub> nanoparticles with core size of 40–60 nm and shell thickness of 12, 30 and 40 nm, respectively.

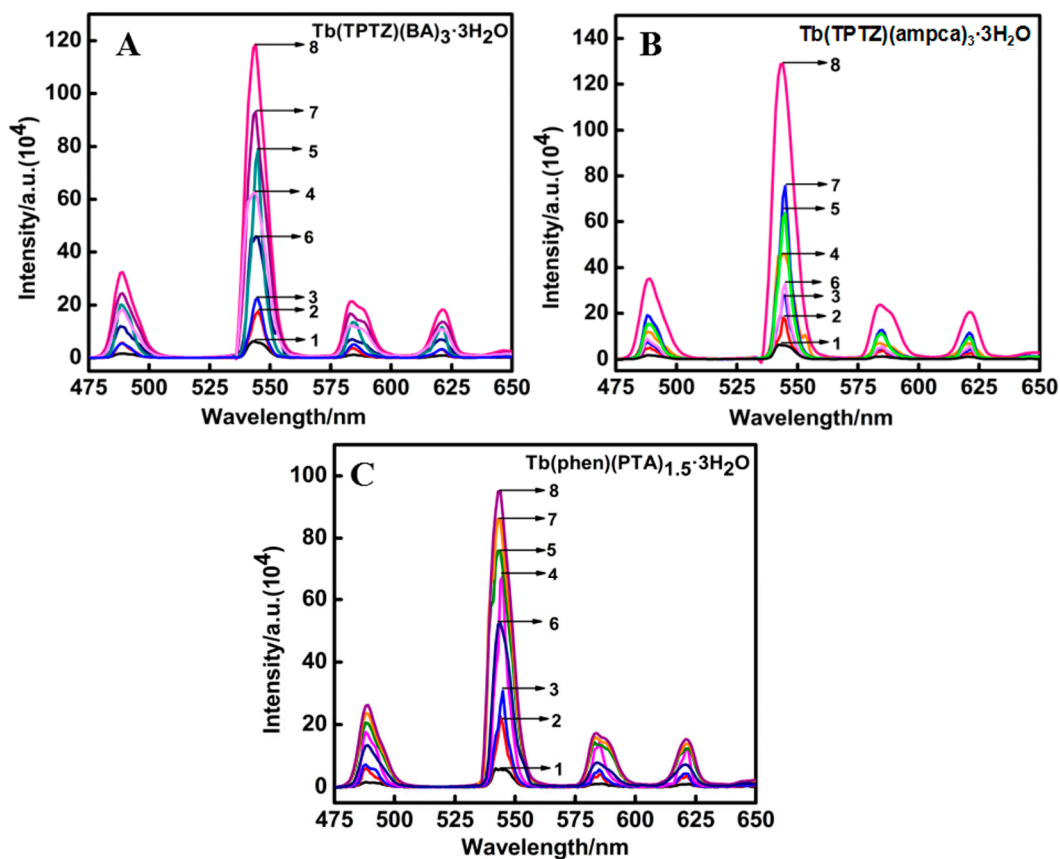

**Fig S3.** Luminescence emission spectra of Tb complexes with Ag@SiO<sub>2</sub> nanoparticles. (A) Tb(TPTZ)(BA)<sub>3</sub>·3H<sub>2</sub>O; (B) Tb(TPTZ)(ampca)<sub>3</sub>·3H<sub>2</sub>O; (C) Tb(phen)(PTA)<sub>1.5</sub>·3H<sub>2</sub>O. Sample 1 is the pure complex. 2~5 represent the complex added with the Ag@SiO<sub>2</sub> nanoparticles with core size of 80–100 nm and shell thickness of 5, 12, 20, 30 nm. 6~8 represent the complex added with the Ag@SiO<sub>2</sub> nanoparticles with core size of 40–60 nm and shell thickness of 12, 30 and 40 nm, respectively.

### 3. Luminescent Enhancement factor of the complexes

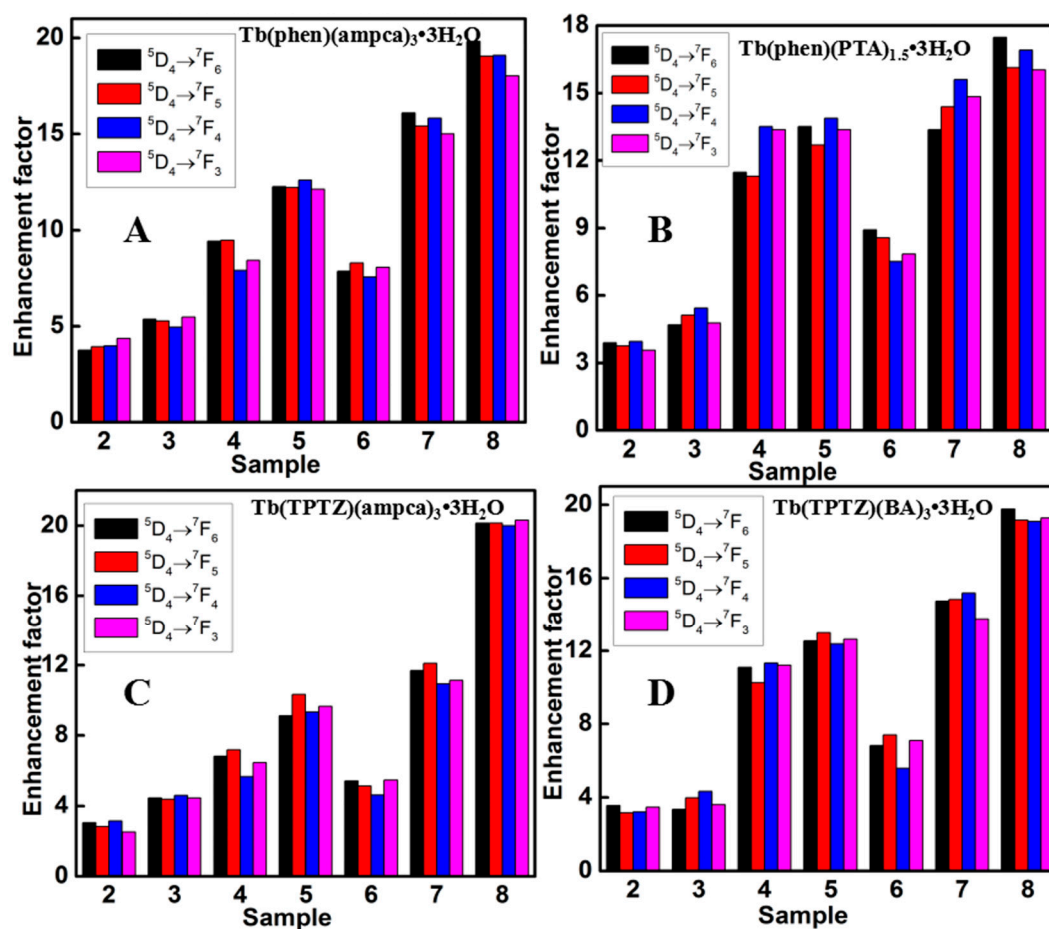

**Fig S4.** Luminescence enhancement factor of Tb complexes with Ag@SiO<sub>2</sub> nanoparticles. (A) Tb(phen)(ampca)<sub>3</sub>•3H<sub>2</sub>O; (B) Tb(phen)(PTA)<sub>1.5</sub>•3H<sub>2</sub>O; (C) Tb(TPTZ)(ampca)<sub>3</sub>•3H<sub>2</sub>O; (D) Tb(TPTZ)(BA)<sub>3</sub>•3H<sub>2</sub>O. Samples 2~5 represent the complex added with the Ag@SiO<sub>2</sub> nanoparticles with core size of 80–100 nm and shell thickness of 5, 12, 20, 30 nm. 6~8 represent the complex added with the Ag@SiO<sub>2</sub> nanoparticles with core size of 40–60 nm and shell thickness of 12, 30 and 40 nm, respectively.

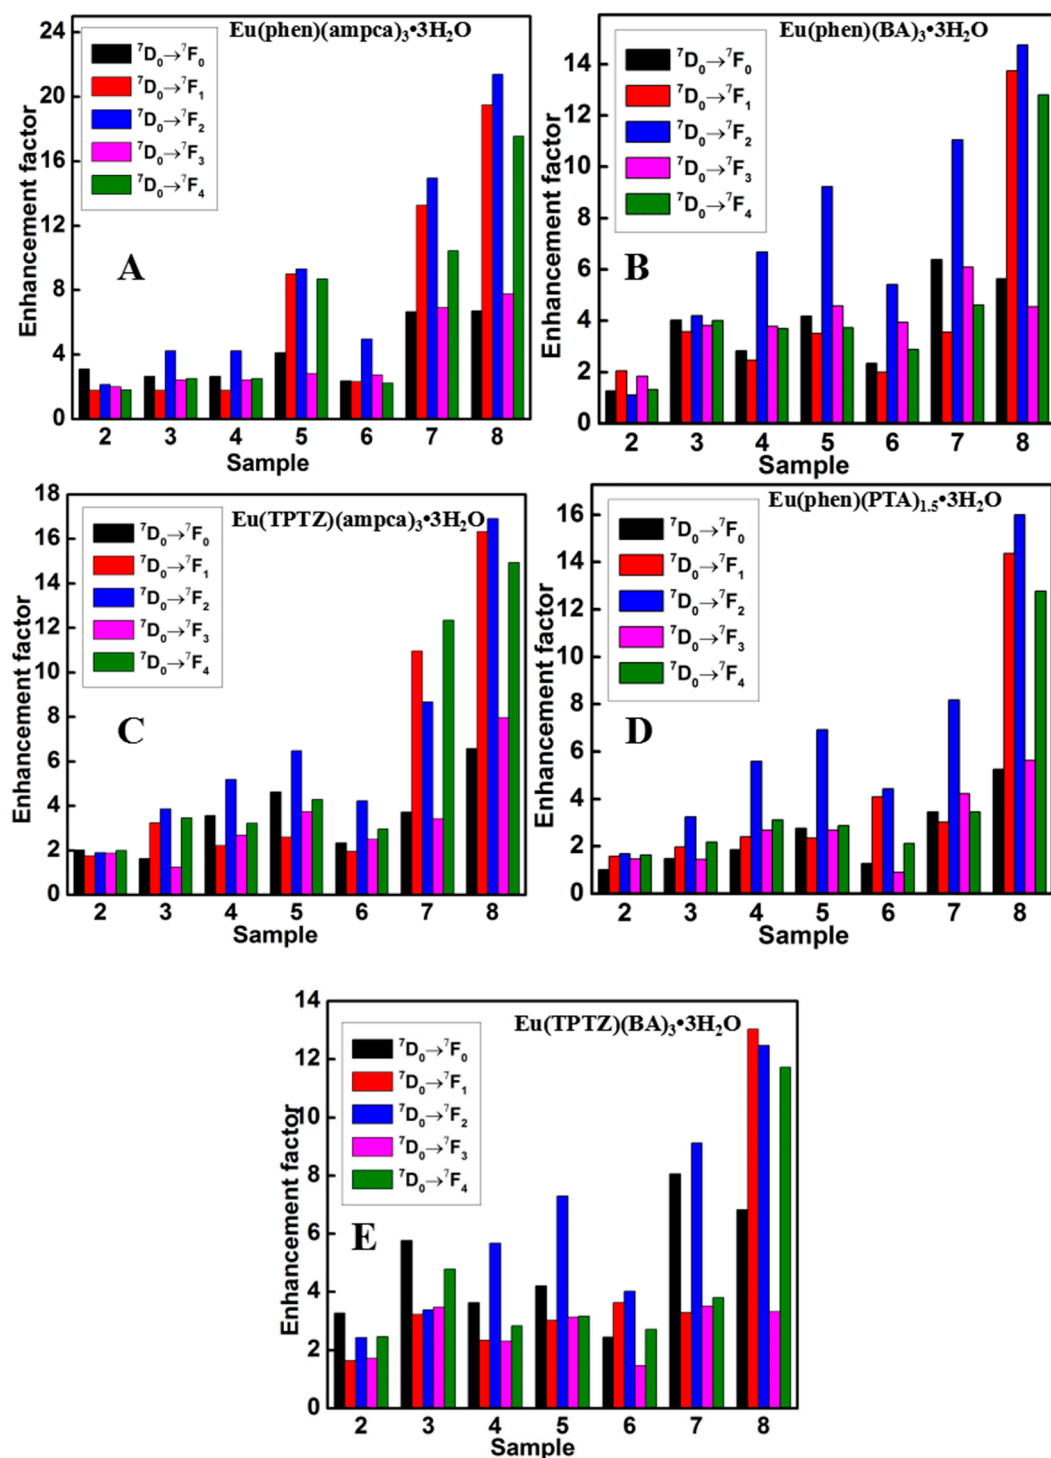

**Fig S5.** Luminescence enhancement factor of Eu complexes with Ag@SiO<sub>2</sub> nanoparticles. (A) Eu(phen)(ampca)<sub>3</sub>·3H<sub>2</sub>O; (B) Eu(phen)(BA)<sub>3</sub>·3H<sub>2</sub>O; (C) Eu(TPTZ)(ampca)<sub>3</sub>·3H<sub>2</sub>O; (D) Eu(phen)(PTA)<sub>1.5</sub>·3H<sub>2</sub>O; (E) Eu(TPTZ)(BA)<sub>3</sub>·3H<sub>2</sub>O. Samples 2~5 represent the complex added with the Ag@SiO<sub>2</sub> nanoparticles with core size of 80–100 nm and shell thickness of 5, 12, 20, 30 nm. 6~8 represent the complex added with the Ag@SiO<sub>2</sub> nanoparticles with core size of 40–60 nm and shell thickness of 12, 30 and 40 nm, respectively.

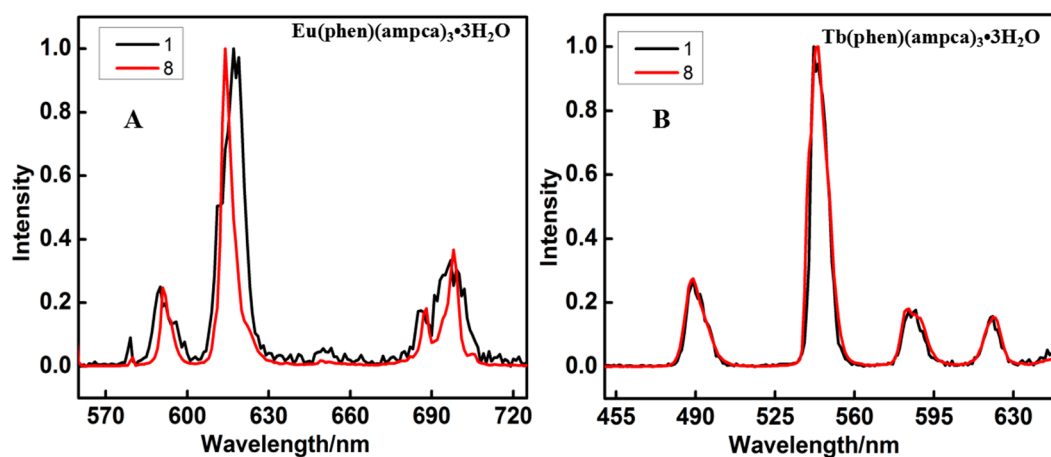

**Fig S6.** Normalized luminescent emission spectra of Eu(phen)(ampca)<sub>3</sub>·3H<sub>2</sub>O (**A**) and Tb(phen)(ampca)<sub>3</sub>·3H<sub>2</sub>O (**B**) before (sample 1) and after (sample 8) the addition of Ag@SiO<sub>2</sub> nanoparticles with core size of 40–60 nm and shell thickness of 40 nm.
